# Supplementary material for: Biological carbon fixation: a thermodynamic perspective
Source: Royal Society of Chemistry journal article supplement (doi:10.1039/d0gc03493b), 2021-01-01
Supplement: d0gc03493b1.xlsx [file d0gc03493b1.xlsx]

## Sheet: supplementary
				0.1 mM ATP
3 HP cycle		ΔrG'm (kJ/mol)		ΔrG' (kJ/mol)
1	2 ATP(aq) + 2 Acetyl-CoA(aq) + 2 HCO3-(aq) ⇌ 2 ADP(aq) + 2 Orthophosphate(aq) + 2Malonyl-CoA(aq)	-10.8 ± 12.9		0.6 ± 12.9
	2 Acetyl-CoA(aq) + 2 HCO3-(aq) ⇌ 2 Malonyl-CoA(aq) + 2 H2O(l)	76.2 ± 12.9
2	2 Malonyl-CoA(aq) + 4 NADPH(aq) ⇌ 2 3-Hydroxypropanoate(aq) + 2 CoA(aq) + 4NADP+(aq)	-72.4 ± 13.5		-72.4 ± 13.5
3	2 3-Hydroxypropanoate(aq) + 2 ATP(aq) + 2 Coenzyme A(aq) + 2 NADPH(aq) ⇌ 2Propanoyl-CoA(aq) + 2 AMP(aq) + 2 NADP+(aq) + 2 Diphosphate(aq) + 2 H2O(l)	-122.1 ± 17.3		-110.7 ± 17.3
	2 3-Hydroxypropanoate(aq) + 2 Coenzyme A(aq) + 2 NADPH(aq) ⇌ 2 Propanoyl-CoA(aq) + 2 NADP (aq) + 4 H2O(l)	-19.0 ± 17.5
4	ATP(aq) + Propanoyl-CoA(aq) + HCO3-(aq) ⇌ ADP(aq) + Orthophosphate(aq) + (S)-Methylmalonyl-CoA(aq)	-3.6 ± 11.8		2.1 ± 11.8
	Propanoyl-CoA(aq) + HCO3-(aq) ⇌ (S)-Methylmalonyl-CoA(aq) + H2O(l)	39.9 ± 11.8
5	(S)-Methylmalonyl-CoA(aq) ⇌ (R)-Methylmalonyl-CoA(aq)	0.0 ± 5.8		0.0 ± 5.8
6	(R)-Methylmalonyl-CoA(aq) ⇌ Succinyl-CoA(aq)	-7.6 ± 4.1		-7.6 ± 4.1
7	Succinate(aq) + Menaquinone(aq) ⇌ Fumarate(aq) + Menaquinol(aq)	14.5 ± 7.1		14.5 ± 7.1
8	Fumarate(aq) + H2O(l) ⇌ (S)-Malate(aq)	-3.5 ± 0.6		-3.5 ± 0.6
9	Succinyl-CoA+(S)-Malate=Succinate+(S)-Malyl-CoA	-4.8 ± 7.4		-4.8 ± 7.4
10	(3S)-3-Carboxy-3-hydroxypropanoyl-CoA(aq) ⇌ Acetyl-CoA(aq) + Glyoxylate(aq)	-4.2 ± 5.8		-4.2 ± 5.8
11	Glyoxylate(aq) + Propanoyl-CoA(aq) ⇌ L-erythro-3-Methylmalyl-CoA(aq)	2.8 ± 16.4		2.8 ± 16.4
12	beta-Methylmalyl-CoA(aq) ⇌ Mesaconyl-CoA(aq) + H2O(l)	-3.2 ± 3.7		-3.2 ± 3.7
13	Mesaconyl-C1-CoA(aq) ⇌ Mesaconyl-C4-CoA(aq)	0		0
14	Mesaconyl-C4-CoA(aq) + H2O(l) ⇌ (3S)-Citramalyl-CoA(aq)	-3.2 ± 3.7		-3.2 ± 3.7
15	Citramalyl-CoA(aq) ⇌ Pyruvate(aq) + Acetyl-CoA(aq)	-7.9 ± 15.3		-7.9 ± 15.3
4HB		ΔrG'm (kJ/mol)
1	CO2(aq) + Acetyl-CoA(aq) + 2 Reduced ferredoxin(aq) ⇌ CoA(aq) + Pyruvate(aq) + 2Oxidized ferredoxin(aq)	18.7 ± 13.2
2	ATP(aq) + Pyruvate(aq) + H2O(l) ⇌ Orthophosphate(aq) + AMP(aq) +Phosphoenolpyruvate(aq)	-13.3 ± 1.0
	Pyruvate(aq) + Orthophosphate(aq) ⇌ Phosphoenolpyruvate(aq) + H2O(l)	71.2 ± 1.1
3	HCO3-(aq) + Phosphoenolpyruvate(aq) ⇌ Orthophosphate(aq) + Oxaloacetate(aq)	-33.6 ± 6.4
4	NADH(aq) + Oxaloacetate(aq) ⇌ NAD+(aq) + (S)-Malate(aq)	-30.3 ± 0.6
5	(S)-Malate(aq) ⇌ Fumarate(aq) + H2O(l)	3.5 ± 0.6
6	Reduced Methyl Viologen+Fumarate=Oxidized Methyl Viologen+Succinate	-35.4
7	ATP(aq) + CoA(aq) + Succinate(aq) ⇌ ADP(aq) + Orthophosphate(aq) + Succinyl-CoA(aq)	-1.8 ± 2.6
	CoA(aq) + Succinate(aq) ⇌ Succinyl-CoA(aq) + H2O(l)	41.7 ± 2.7
8	Reduced Methyl Viologen + Succinyl-CoA(aq) ⇌ 2Oxidized Methyl Viologen (aq) + CoA(aq) + Succinate semialdehyde(aq)	19
9	Succinate semialdehyde(aq) + NADPH(aq) ⇌ 4-Hydroxybutyrate(aq) + NADP+(aq)	-1.2 ± 3.4
10	4-Hydroxybutyrate(aq) + CoA(aq) + ATP(aq) ⇌ 4-Hydroxybutyryl-CoA(aq) + AMP(aq) + PPi(aq)	-26.8 ± 15.3
	4-Hydroxybutyrate(aq) + CoA(aq) ⇌ 4-Hydroxybutyryl-CoA(aq) + H2O(l)	24.8 ± 15.3
11	4-Hydroxybutyryl-CoA(aq) ⇌ Crotonyl-CoA(aq) + H2O(l)	-7.8 ± 15.6
12	Crotonyl-CoA(aq) + H2O(l) ⇌ (S)-3-Hydroxybutyryl-CoA(aq)	-3.8 ± 3.3
13	NAD+(aq) + (S)-3-Hydroxybutanoyl-CoA(aq) ⇌ NADH(aq) + Acetoacetyl-CoA(aq)	18.0 ± 2.4
14	CoA(aq) + Acetoacetyl-CoA(aq) ⇌ 2 Acetyl-CoA(aq)	-26.1 ± 1.7
3HP/4HB		ΔrG'm (kJ/mol)
1	ATP(aq) + Acetyl-CoA(aq) + HCO3-(aq) ⇌ ADP(aq) + Orthophosphate(aq) + Malonyl-CoA(aq)	-5.4 ± 6.5
	Acetyl-CoA(aq) + HCO3-(aq) ⇌ Malonyl-CoA(aq) + H2O(l)	38.1 ± 6.5
2	NADPH(aq) + Malonyl-CoA(aq) ⇌ NADP (aq) + CoA(aq) + 3-Oxopropanoate(aq)	-11.4 ± 8.8
3	Malonate semialdehyde(aq) + NADPH(aq) ⇌ 3-Hydroxypropionate(aq) + NADP(aq)	-24.8 ± 5.8
4	ATP(aq) + CoA(aq) + 3-Hydroxypropanoate(aq) ⇌ Diphosphate(aq) + AMP(aq) + 3-Hydroxypropionyl-CoA(aq)	1.4 ± 16.1
	CoA + 3-Hydroxypropanoate <=> 3-Hydroxypropionyl-CoA+H20	53.0 ± 16.1
5	3-Hydroxypropionyl-CoA(aq) ⇌ Acryloyl-CoA(aq) + H2O(l)	0.0 ± 3.8
	3-Hydroxypropionyl-CoA(aq) ⇌ Propenoyl-CoA(aq) + H2O(l)	0.0 ± 3.8
6	Acryloyl-CoA(aq) + NADPH(aq) ⇌ Propionyl-CoA(aq) + NADP+(aq)	-62.5 ± 16.9
7	ATP(aq) + Propanoyl-CoA(aq) + HCO3-(aq) ⇌ ADP(aq) + Orthophosphate(aq) + (S)-Methylmalonyl-CoA(aq)	-3.6 ± 11.8
	Propanoyl-CoA(aq) + HCO3-(aq) ⇌ (S)-Methylmalonyl-CoA(aq) + H2O(l)	39.9 ± 11.8
8	(R)-Methylmalonyl-CoA(aq) ⇌ (S)-Methylmalonyl-CoA(aq)	0.0 ± 5.8
9	(R)-Methylmalonyl-CoA(aq) ⇌ Succinyl-CoA(aq)	-7.6 ± 4.1
10	NADPH(aq) + Succinyl-CoA(aq) ⇌ NADP (aq) + CoA(aq) + Succinate semialdehyde(aq)	-9.7 ± 5.4
11	succinate semialdehyde + NADPH <=> 4-hydroxybutyrate + NADP+	-1.2 ± 3.4
12	4-Hydroxybutyric acid(aq) + ATP(aq) + CoA(aq) ⇌ 4-Hydroxybutyryl-CoA(aq) +AMP(aq) + PPi(aq)	-26.8 ± 15.3
	4-Hydroxybutyric acid(aq) + CoA(aq) ⇌ 4-Hydroxybutyryl-CoA(aq) + H2O(l)	24.8 ± 15.3
13	4-Hydroxybutyryl-CoA <=> Crotonyl-CoA + H2O	-7.8 ± 15.6
14	Crotonyl-CoA(aq) + H2O(l) ⇌ (S)-3-Hydroxybutyryl-CoA(aq)	-3.8 ± 3.3
15	NADP (aq) + (S)-3-Hydroxybutanoyl-CoA(aq) ⇌ NADPH(aq) + Acetoacetyl-CoA(aq)	19.0 ± 2.5
16	CoA + Acetoacetyl-CoA <=> 2 Acetyl-CoA	-26.1 ± 1.7
rTCA		ΔrG'm (kJ/mol)
1	Citrate(aq) + CoA(aq) + ATP(aq) ⇌ Acetyl-CoA(aq) +Oxaloacetate(aq) + AMP(aq) + PPi(aq)	-17.0 ± 1.1
	Citrate(aq) + CoA(aq) ⇌ Acetyl-CoA(aq) + Oxaloacetate(aq) + H2O(l)	34.6 ± 0.9
2	NADH(aq) + Oxaloacetate(aq) ⇌ NAD+(aq) + (S)-Malate(aq)	-30.3 ± 0.6
3	(S)-Malate(aq) ⇌ Fumarate(aq) + H2O(l)	3.5 ± 0.6
4	Fumarate(aq) + FADH2(aq) ⇌ FAD(aq) + Succinate(aq)	-46.2 ± 7.1
5	ATP(aq) + CoA(aq) + Succinate(aq) ⇌ ADP(aq) + Orthophosphate(aq)+ Succinyl-CoA(aq)	-1.8 ± 2.6
	CoA(aq) + Succinate(aq) ⇌ Succinyl-CoA(aq) + H2O(l)	41.7 ± 2.7
6	CO2(aq) + Succinyl-CoA(aq) + 2 Reduced ferredoxin(aq) ⇌ CoA(aq) +2-Oxoglutarate(aq) + 2 Oxidized ferredoxin(aq)	10.6 ± 13.9
7	NADPH(aq) + CO2(aq) + 2-Oxoglutarate(aq) ⇌ NADP+(aq) +Isocitrate(aq)	10.7 ± 6.3
8	Isocitrate(aq) ⇌ Citrate(aq)	-7.6 ± 0.7
The reductive acetyl-CoA (Wood-Ljungdahl) pathway		ΔrG'm (kJ/mol)
1	NADPH(aq) + CO2(aq) ⇌ NADP (aq) + Formate(aq)	13.1 ± 6.5
2	ATP(aq) + Formate(aq) + Tetrahydrofolate(aq) ⇌ ADP(aq) +Orthophosphate(aq) + 10-Formyltetrahydrofolate(aq)	-4.8 ± 3.8
	Formate(aq) + Tetrahydrofolate(aq) ⇌ 10-Formyltetrahydrofolate(aq) + H2O(l)	38.7 ± 3.9
3	10-Formyltetrahydrofolate(aq) ⇌ 5,10-Methenyltetrahydrofolate(aq)+ H2O(l)	5.0 ± 1.8
4	NADPH(aq) + 5,10-Methenyltetrahydrofolate(aq) ⇌ NADP (aq) +5,10-Methylenetetrahydrofolate(aq)	-9.9 ± 2.3
5	2 Reduced ferredoxin(aq) + 5,10-Methylenetetrahydrofolate(aq) ⇌ 2Oxidized ferredoxin(aq) + 5-Methyltetrahydrofolate(aq)	-54.5 ± 14.2
6	CO2(aq) + 2 Reduced ferredoxin(aq) ⇌ 2 Oxidized ferredoxin(aq) +CO(aq) + H2O(l)	27.7 ± 14.3		0.1 mM ATP		0.05 M	0.2 M
7	CoA(aq) + CO(aq) + 5-Methyltetrahydrofolate(aq) ⇌ Acetyl-CoA(aq) +Tetrahydrofolate(aq)	-37.7 ± 10.5
CBB		ΔrG'm (kJ/mol)		ΔrG' (kJ/mol)		ΔrG' (kJ/mol)	ΔrG' (kJ/mol)
	3 Oxygen + 3 d-ribulose 1,5-biphosphate <=> 3 3-Phospho-D-glycerate + 3 2-Phosphoglycolate	-1561.9 ± 20.0
1	3 CO2(aq) + 3 d-ribulose 1,5-biphosphate(aq) + 3 H2O(l) ⇌ 6 3-Phospho-D-glycerate(aq)	-85.1 ± 22.4		-85.1 ± 22.4		-83.6 ± 22.4	-86.8 ± 22.4
2	6 ATP(aq) + 6 3-Phospho-D-glycerate(aq) ⇌ 6 ADP(aq) + 6 3-Phospho-D-glyceroyl phosphate(aq)	110.7 ± 5.2		144.9 ± 5.2		110.6 ± 5.2	111.0 ± 5.2
	6 Pi(aq) + 6 3-Phospho-D-glycerate(aq) ⇌ 6 3-Phospho-D-glyceroyl phosphate(aq) + 6 H2O(l)	371.8 ± 6.3				374.1 ± 6.3	369.2 ± 6.3
3	6 NADPH(aq) + 6 3-Phospho-D-glyceroyl phosphate(aq) ⇌ 6 NADP(aq)+ 6 Orthophosphate(aq) + 6 d-glyceraldehyde-3-phosphate(aq)	-155.3 ± 6.2		-155.3 ± 6.2		-168.7 ± 6.2	-140.3 ± 6.2
4	2 D-Glyceraldehyde 3-phosphate(aq) ⇌ 2 Glycerone phosphate(aq)	-11.0 ± 2.2		-11.0 ± 2.2		-10.9 ± 2.2	-11.0 ± 2.2
5	Glycerone phosphate(aq) + D-Glyceraldehyde 3-phosphate(aq) ⇌Fructose-1,6-bisphosphate(aq)	-0.7 ± 4.4		-0.7 ± 4.4		0.4 ± 4.4	-2.0 ± 4.4
6	Fructose-1,6-bisphosphate(aq) + H2O(l) ⇌ Orthophosphate(aq) + D-Fructose 6-phosphoric acid(aq)	-30.5 ± 4.3		-30.5 ± 4.3		-31.7 ± 4.3	-29.2 ± 4.3
7	D-Fructose 6-phosphoric acid(aq) + D-Glyceraldehyde 3-phosphate(aq) ⇌ D-Xylulose-5-phosphate(aq) + D-Erythrose 4-phosphate(aq)	10.0 ± 3.8		10.0 ± 3.8		10.0 ± 3.8	10.0 ± 3.8
8	Glycerone phosphate(aq) + D-Erythrose 4-phosphate(aq) ⇌Sedoheptulose-bisphosphate(aq)	4.8 ± 5.6		4.8 ± 5.6		5.8 ± 5.6	3.6 ± 5.6
9	Sedoheptulose-bisphosphate(aq) + H2O(l) ⇌ Orthophosphate(aq) +Sedoheptulose-7-phosphate(aq)	-35.3 ± 5.7		-35.3 ± 5.7		-36.5 ± 5.7	-34.0 ± 5.7
10	D-Ribose-5-phosphate(aq) ⇌ D-Ribulose-5-phosphate(aq)	1.9 ± 1.5		1.9 ± 1.5		1.9 ± 1.5	2.0 ± 1.5
11	2 D-Xylulose-5-phosphate(aq) = 2 D-Ribulose-5-phosphate(aq)	6.7 ± 4.6		6.7 ± 4.6		6.7 ± 4.6	6.7 ± 4.6
12	3 ATP(aq) + 3 D-Ribulose-5-phosphate(aq) ⇌ 3 ADP(aq) + 3 d-ribulose 1,5-biphosphate(aq)	-56.6 ± 13.5		-39.5 ± 13.5		-54.3 ± 13.5	-59.1 ± 13.5
	3 D-Ribulose-5-phosphate(aq) + 3 Pi(aq) ⇌ 3 d-ribulose 1,5-biphosphate(aq) + 3 H2O(l)	73.9 ± 13.5		-3.2		70.0 ± 13.5	70.0 ± 13.5
13	Glycerone phosphate(aq) + D-Sedoheptulose-7-phosphate(aq) ⇌ D-Ribose-5-phosphate(aq) + D-Xylulose-5-phosphate(aq)	9.3 ± 3.9		0		9.3 ± 3.9	9.3 ± 3.9
WL-rGly		ΔrG'm (kJ/mol)
1	ATP(aq) + Formate(aq) + Tetrahydrofolate(aq) ⇌ ADP(aq) +Orthophosphate(aq) + 10-Formyltetrahydrofolate(aq)	-4.8 ± 3.8
	Formate(aq) + Tetrahydrofolate(aq) ⇌ 10-Formyltetrahydrofolate(aq) + H2O(l)	38.7 ± 3.9
2	10-Formyltetrahydrofolate(aq) ⇌ 5,10-Methenyltetrahydrofolate(aq)+ H2O(l)	5.0 ± 1.8
3	NADPH(aq) + 5,10-Methenyltetrahydrofolate(aq) ⇌ NADP (aq) +5,10-Methylenetetrahydrofolate(aq)	-9.9 ± 2.3
4	5,10-Methylenetetrahydrofolate(aq) + CO2(aq) + NH3(aq) + NADH(aq) ⇌ Glycine(aq) + Tetrahydrofolate(aq) + NAD+(aq)	-5.6 ± 7.2
5	ATP(aq) + Formate(aq) + Tetrahydrofolate(aq) ⇌ ADP(aq) +Orthophosphate(aq) + 10-Formyltetrahydrofolate(aq)	-4.8 ± 3.8
	Formate(aq) + Tetrahydrofolate(aq) ⇌ 10-Formyltetrahydrofolate(aq) + H2O(l)	38.7 ± 3.9
6	10-Formyltetrahydrofolate(aq) ⇌ 5,10-Methenyltetrahydrofolate(aq)+ H2O(l)	5.0 ± 1.8
7	NADPH(aq) + 5,10-Methenyltetrahydrofolate(aq) ⇌ NADP (aq) +5,10-Methylenetetrahydrofolate(aq)	-9.9 ± 2.3
8	5,10-Methylenetetrahydrofolate(aq) + Glycine(aq) + H2O(l) ⇌ Serine(aq) + THF(aq)	6.5 ± 2.5
9	L-Serine(aq) ⇌ NH3(aq) + Pyruvate(aq)	-45.8 ± 1.8
modified Serine cycle		ΔrG'm (kJ/mol)
1	ATP(aq) + Formate(aq) + Tetrahydrofolate(aq) ⇌ ADP(aq) +Orthophosphate(aq) + 10-Formyltetrahydrofolate(aq)	-4.8 ± 3.8
	Formate(aq) + Tetrahydrofolate(aq) ⇌ 10-Formyltetrahydrofolate(aq) + H2O(l)	38.7 ± 3.9
2	10-Formyltetrahydrofolate(aq) ⇌ 5,10-Methenyltetrahydrofolate(aq)+ H2O(l)	5.0 ± 1.8
3	NADPH(aq) + 5,10-Methenyltetrahydrofolate(aq) ⇌ NADP (aq) +5,10-Methylenetetrahydrofolate(aq)	-9.9 ± 2.3
4	5,10-Methylenetetrahydrofolate(aq) + Glycine(aq) + H2O(l) ⇌ Serine(aq) + THF(aq)	6.5 ± 2.5
5	L-Serine(aq) ⇌ NH3(aq) + Pyruvate(aq)	-45.8 ± 1.8
6	ATP(aq) + Pyruvate(aq) + H2O(l) ⇌ Orthophosphate(aq) + AMP(aq) +Phosphoenolpyruvate(aq)	-13.3 ± 1.0
	Pyruvate(aq) + Pi(aq) ⇌ Phosphoenolpyruvate(aq) + H2O(l)	71.2 ± 1.1
7	HCO3-(aq) + Phosphoenolpyruvate(aq) ⇌ Orthophosphate(aq) + Oxaloacetate(aq)	-33.6 ± 6.4
8	NADH(aq) + Oxaloacetate(aq) ⇌ NAD+(aq) + (S)-Malate(aq)	-30.3 ± 0.6
9	ATP(aq) + CoA(aq) + (S)-Malate(aq) ⇌ ADP(aq) + Orthophosphate(aq) + (3S)-3-Carboxy-3-hydroxypropanoyl-CoA(aq)	-6.6 ± 7.1
	CoA(aq) + (S)-Malate(aq) ⇌ (3S)-3-Carboxy-3-hydroxypropanoyl-CoA(aq) + H2O(l)	36.9 ± 7.1
10	(3S)-3-Carboxy-3-hydroxypropanoyl-CoA(aq) ⇌ Acetyl-CoA(aq) + Glyoxylate(aq)	-4.2 ± 5.8
11	L-Alanine(aq) + Glyoxylate(aq) ⇌ Pyruvate(aq) + Glycine(aq)	-8.3 ± 3.3
12	Pyruvate(aq) + L-Glutamate(aq) ⇌ 2-Oxoglutarate(aq) + L-Alanine(aq)	0.2 ± 1.1
13	NADH(aq) + NH3(aq) + 2-Oxoglutarate(aq) ⇌ NAD+(aq) + L-Glutamate(aq) + H2O(l)	-20.8 ± 0.6
SACA		ΔrG'm (kJ/mol)
1	2 Formaldehyde(aq) ⇌ Glycolaldehyde(aq)	-27.9 ± 6.5
2	Glycolaldehyde(aq) + Pi(aq) ⇌ Acetyl phosphate(aq) + H2O(l)	-59.0 ± 3.8
3	Acetyl phosphate(aq) + CoA(aq) ⇌ Acetyl-CoA(aq) + Pi(aq)	-9.8 ± 1.2
SETCH		ΔrG'm (kJ/mol)
1	Crotonyl-CoA(aq) + NADPH(aq) + CO2(aq) ⇌ Ethylmalonyl-CoA(aq) + NADP+(aq)	-25.8 ± 17.0
2	Ethylmalonyl-CoA(aq) ⇌ Methylsuccinyl-CoA(aq)	0.0 ± 0.0
3	Methylsuccinyl-CoA(aq) + Ubiquinone(aq) ⇌ Mesaconyl-CoA(aq) + Ubiquinol(aq)	-25.4 ± 6.7
4	Mesaconyl-CoA(aq) + H2O(l) ⇌ beta-Methylmalyl-CoA(aq)	3.2 ± 3.7
5	beta-Methylmalyl-CoA(aq) ⇌ Propionyl-CoA(aq) + Glyoxylate(aq)	-2.8 ± 16.4
6	Propionyl-CoA(aq) + ATP(aq) + HCO3-(aq) ⇌ Methylmalonyl-CoA(aq) + ADP(aq) + Pi(aq)	-3.6 ± 10.3
	Propionyl-CoA(aq) + HCO3-(aq) ⇌ Methylmalonyl-CoA(aq) + H2O(l)	39.9 ± 10.3
7	Methylmalonyl-CoA(aq) ⇌ Succinyl-CoA(aq)	-7.6 ± 4.1
8	Succinyl-CoA(aq) + NADPH(aq) ⇌ Succinic semialdehyde(aq) + CoA(aq) + NADP+(aq)	-9.7 ± 5.4
9	Succinic semialdehyde(aq) + NADPH(aq) ⇌ 4-Hydroxybutyric acid(aq) + NADP+(aq)	-1.2 ± 3.4
10	4-Hydroxybutyric acid(aq) + CoA(aq) + ATP(aq) ⇌ 4-Hydroxybutyryl-CoA(aq) + ADP(aq) + Pi(aq)	-18.7 ± 15.3
	4-Hydroxybutyric acid(aq) + CoA(aq) ⇌ 4-Hydroxybutyryl-CoA(aq) + H2O(l)	24.8 ± 15.3
11	4-Hydroxybutyryl-CoA(aq) ⇌ Crotonyl-CoA(aq) + H2O(l)	-7.8 ± 15.6
